# Supplementary material
Source: MDPI journal article supplement (https://www.mdpi.com/2073-4441/9/8/567)
Supplement: s1 [file s1]

# Supplementary Materials: Comparison of SWAT and GWLF model simulation performance in humid south and semi-arid north of China

Zuoda Qi <sup>1</sup>, Gelin Kang <sup>1</sup>, Chunli Chu <sup>1,\*</sup>, Yu Qiu <sup>1</sup>, Ze Xu <sup>2</sup> and Yuqiu Wang <sup>1, \*\*</sup>

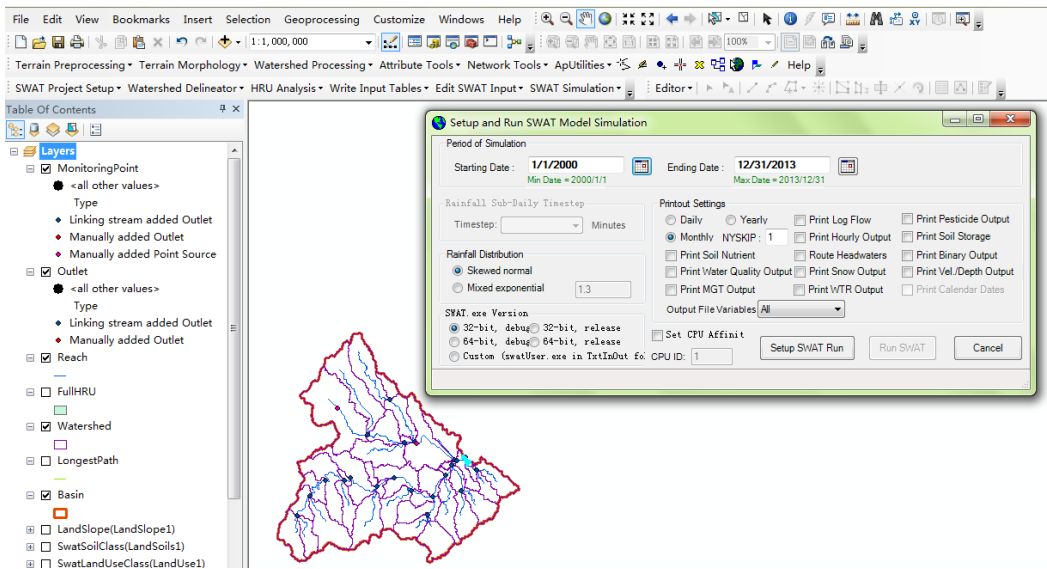

Figure S1. The interface of the SWAT model

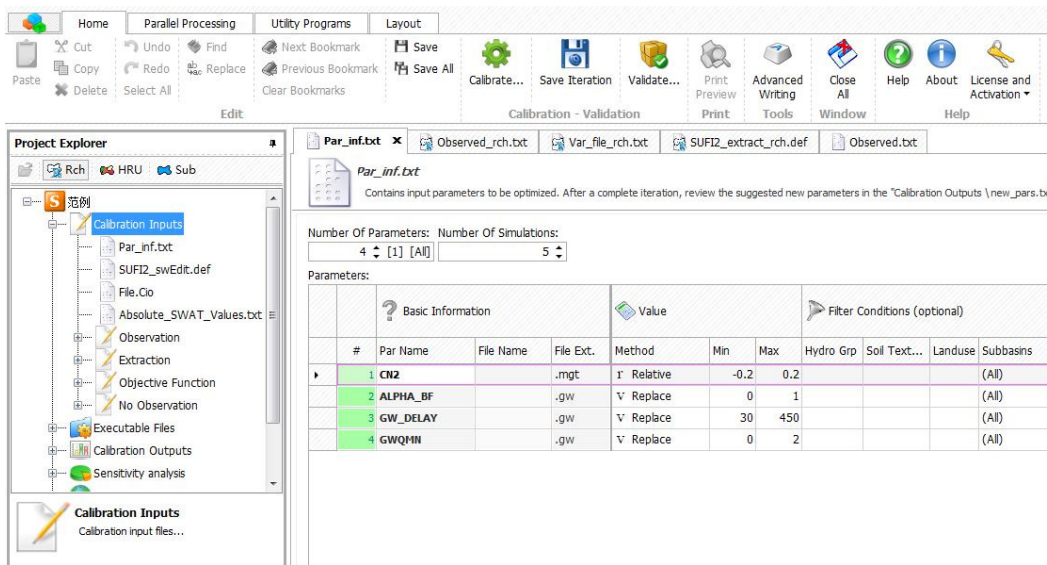

Figure S2. The interface of the SWAT-CUP

Microsoft Excel - ReNuMa\_v2 2.2.xls

文件(F) 编辑(E) 视图(V) 插入(I) 格式(O) 工具(T) 数据(D) 窗口(W) 帮助(H)

30 85% Arial 10 B I U

|    | A                                                                   | B | C | D | E           | F | G                                                                      | H | I | J | K |  |
|----|---------------------------------------------------------------------|---|---|---|-------------|---|------------------------------------------------------------------------|---|---|---|---|--|
| 1  | <b>Simulation Period</b>                                            |   |   |   |             |   | <b>ReNuMa 2.0 Options</b>                                              |   |   |   |   |  |
| 2  | initial year                                                        |   |   |   | 2001        |   | annual or monthly deposition (a/m)                                     |   |   |   | a |  |
| 3  | initial month                                                       |   |   |   | 1           |   | (calibration/Bayesian analysis only) annual, monthly, or daily (a/m/d) |   |   |   | m |  |
| 4  | number of years of simulation                                       |   |   |   | 9           |   | b worksheet name (blank for original curve number method)              |   |   |   |   |  |
| 5  |                                                                     |   |   |   |             |   | annual land areas worksheet name                                       |   |   |   |   |  |
| 6  | <b>Simulation Method</b>                                            |   |   |   |             |   | <b>ReNuMa 2.2 Options</b>                                              |   |   |   |   |  |
| 7  | spin-up period (0 for no spin-up simulation)                        |   |   |   | 1           |   | GWLF version (1 or 2)                                                  |   |   |   | 2 |  |
| 8  | repeat spin-up data (y/n)                                           |   |   |   | n           |   |                                                                        |   |   |   |   |  |
| 9  | use trajectory (y/n)                                                |   |   |   | n           |   |                                                                        |   |   |   |   |  |
| 10 | (uncertainty/Bayesian analysis only) number of realizations         |   |   |   | 100         |   |                                                                        |   |   |   |   |  |
| 11 | (sensitivity analysis only) annual or monthly (a/m)                 |   |   |   | a           |   |                                                                        |   |   |   |   |  |
| 12 | (sensitivity analysis only) specific year (blank for all years)     |   |   |   |             |   |                                                                        |   |   |   |   |  |
| 13 | (sensitivity analysis only) specific month (blank for all months)   |   |   |   |             |   |                                                                        |   |   |   |   |  |
| 14 |                                                                     |   |   |   |             |   |                                                                        |   |   |   |   |  |
| 15 | <b>Reporting</b>                                                    |   |   |   |             |   |                                                                        |   |   |   |   |  |
| 16 | annual report (y/n)                                                 |   |   |   | y           |   |                                                                        |   |   |   |   |  |
| 17 | monthly report (y/n)                                                |   |   |   | y           |   |                                                                        |   |   |   |   |  |
| 18 | daily report (y/n)                                                  |   |   |   | n           |   |                                                                        |   |   |   |   |  |
| 19 | report by category 1 (y/n)                                          |   |   |   | y           |   |                                                                        |   |   |   |   |  |
| 20 | report by category 2 (y/n)                                          |   |   |   | y           |   |                                                                        |   |   |   |   |  |
| 21 |                                                                     |   |   |   |             |   |                                                                        |   |   |   |   |  |
| 22 | <b>Calculations</b>                                                 |   |   |   |             |   |                                                                        |   |   |   |   |  |
| 23 | use latitude to calculate daylength (y/n)                           |   |   |   | y           |   |                                                                        |   |   |   |   |  |
| 24 | (if using latitude) latitude in degrees                             |   |   |   | 30          |   |                                                                        |   |   |   |   |  |
| 25 |                                                                     |   |   |   |             |   |                                                                        |   |   |   |   |  |
| 26 | <b>Input / Output</b>                                               |   |   |   |             |   |                                                                        |   |   |   |   |  |
| 27 | default drive name                                                  |   |   |   | C:\         |   |                                                                        |   |   |   |   |  |
| 28 | default folder name                                                 |   |   |   | WorkReNuMa\ |   |                                                                        |   |   |   |   |  |
| 29 | batch mode (y/n)                                                    |   |   |   | n           |   |                                                                        |   |   |   |   |  |
| 30 |                                                                     |   |   |   |             |   |                                                                        |   |   |   |   |  |
| 31 | <b>single run (non-batch mode) simulation options</b>               |   |   |   |             |   |                                                                        |   |   |   |   |  |
| 32 | transport parameter worksheet name                                  |   |   |   | transport   |   |                                                                        |   |   |   |   |  |
| 33 | nutrient parameter worksheet name                                   |   |   |   | nutrient    |   |                                                                        |   |   |   |   |  |
| 34 | read weather from text file or worksheet (t/s)                      |   |   |   | s           |   |                                                                        |   |   |   |   |  |
| 35 | (if reading weather from text file) weather data file name          |   |   |   | weather.txt |   |                                                                        |   |   |   |   |  |
| 36 | (if from worksheet) weather workbook name (blank for this workbook) |   |   |   |             |   |                                                                        |   |   |   |   |  |
| 37 | (if from worksheet) weather worksheet name                          |   |   |   | weather     |   |                                                                        |   |   |   |   |  |
| 38 | annual output worksheet name                                        |   |   |   | annual      |   |                                                                        |   |   |   |   |  |
| 39 | monthly output worksheet name                                       |   |   |   | monthly     |   |                                                                        |   |   |   |   |  |
| 40 | daily output worksheet name                                         |   |   |   | daily       |   |                                                                        |   |   |   |   |  |

Figure S3. The interface of GWLF modeling platform-ReNuMa
